# Supplementary material for: Hormone mediated dispersal and sexual maturation in males of the social paper wasp Polistes lanio
Source: Oxford University Press journal article supplement (doi:10.1242/jeb.226472), 2020-01-01
Supplement: jeb226472supp.pdf [file jeb226472supp.pdf]

Table S1. Characteristics of natal male nests. Locations: VV = Verdant Vale; EM = Eastern Main Rd; CT = Cumuto Tamana Rd. Means to 1 d.p.; nest comb size recorded once during departure/observation dates; mean number of adults between departure/observation dates.

| Year | ID    | Location | Site and Number                    |                                          | Nest Comb Size              |                      |                        |                       |                             | Adults Present on Dispersal       |                              |                              |
|------|-------|----------|------------------------------------|------------------------------------------|-----------------------------|----------------------|------------------------|-----------------------|-----------------------------|-----------------------------------|------------------------------|------------------------------|
|      |       |          | Departure/<br>Observation<br>Dates | Number of<br>Observed<br>Male Dispersals | Total<br>Number<br>of Cells | Number<br>of<br>Eggs | Number<br>of<br>Larvae | Number<br>of<br>Pupae | Number<br>of Empty<br>Cells | Number of<br>Parasitised<br>Cells | Mean<br>Number of<br>Adult ♀ | Mean<br>Number of<br>Adult ♂ |
| 2014 | 14002 | VV       | 20 Jun                             | 1                                        | 160                         | 13                   | 0                      | 1                     | 146                         | 0                                 | 6.0                          | 1.0                          |
| 2014 | 14003 | VV       | 22–24 Jun                          | 3                                        | 334                         | 56                   | 58                     | 15                    | 205                         | 0                                 | 17.0                         | 1.0                          |
| 2014 | 14005 | VV       | 25 Jun                             | 1                                        | 104                         | 32                   | 36                     | 14                    | 22                          | 0                                 | 10.0                         | 0.0                          |
| 2014 | 14006 | VV       | 17–24 Jul                          | 5                                        | 59                          | 7                    | 0                      | 1                     | 40                          | 11                                | 4.1                          | 1.3                          |
| 2014 | 14007 | VV       | 29 Jun–03 Jul                      | 2                                        | 79                          | 20                   | 32                     | 12                    | 15                          | 0                                 | 7.6                          | 0.8                          |
| 2014 | 14008 | VV       | 13–14 Jul                          | 4                                        | 146                         | 30                   | 37                     | 26                    | 35                          | 18                                | 10.5                         | 2.5                          |
| 2014 | 14017 | VV       | 27 Jul                             | 1                                        | 163                         | 10                   | 0                      | 0                     | 151                         | 2                                 | 8.0                          | 1.0                          |
| 2014 | 14020 | VV       | 25 Jun–03 Jul                      | 6                                        | 165                         | 35                   | 55                     | 12                    | 61                          | 2                                 | 10.9                         | 1.7                          |
| 2014 | 14022 | VV       | 24–28 Jul                          | 2                                        | 171                         | 38                   | 34                     | 10                    | 88                          | 1                                 | 6.8                          | 0.3                          |
| 2014 | 14031 | VV       | 21 Jul                             | 1                                        | 118                         | 0                    | 0                      | 7                     | 111                         | 0                                 | 13.0                         | 0.0                          |
| 2014 | 14042 | VV       | 25 Jun–03 Jul                      | 10                                       | 165                         | 4                    | 1                      | 6                     | 154                         | 0                                 | 5.9                          | 2.8                          |
| 2014 | 14049 | EM       | 14–15 Jul                          | 3                                        | 83                          | 0                    | 0                      | 4                     | 79                          | 0                                 | 8.5                          | 2.5                          |
| 2014 | 14082 | EM       | 02 Aug                             | 2                                        | 152                         | 11                   | 2                      | 18                    | 121                         | 0                                 | 7.0                          | 2.0                          |
| 2014 | 14096 | EM       | 13–15 Jul                          | 2                                        | 248                         | 100                  | 95                     | 24                    | 29                          | 0                                 | 21.0                         | 0.7                          |
| 2014 | 14333 | EM       | 18–20 Jul                          | 5                                        | 70                          | 6                    | 0                      | 2                     | 62                          | 0                                 | 5.0                          | 1.3                          |
| 2015 | 15000 | VV       | 19–21 Jul                          | 3                                        | 126                         | 23                   | 16                     | 17                    | 70                          | 0                                 | 8.0                          | 1.0                          |
| 2015 | 15001 | VV       | 22 July–07 Aug                     | 4                                        | 180                         | 0                    | 1                      | 30                    | 149                         | 0                                 | 5.3                          | 9.3                          |
| 2015 | 15003 | VV       | 22–29 Jul                          | 10                                       | 117                         | 0                    | 0                      | 5                     | 112                         | 0                                 | 3.3                          | 4.6                          |
| 2015 | 15011 | CT       | 20 Aug–07 Sept                     | 28                                       | 335                         | 59                   | 148                    | 49                    | 79                          | 0                                 | 8.8                          | 5.9                          |
| 2015 | 15012 | CT       | 29 Aug–07 Sept                     | 30                                       | 484                         | 131                  | 157                    | 131                   | 65                          | 0                                 | 26.0                         | 26.9                         |
| 2015 | 15013 | CT       | 23 July, 06–08 Sept                | 5                                        | 128                         | 51                   | 56                     | 18                    | 3                           | 0                                 | 5.7                          | 3.7                          |
| 2015 | 15017 | EM       | 01–03 Sept                         | 4                                        | 309                         | 0                    | 6                      | 44                    | 259                         | 0                                 | 14.0                         | 6.0                          |
| 2015 | 15018 | EM       | 31 Aug–02 Sept                     | 18                                       | -                           | -                    | -                      | -                     | -                           | -                                 | 17.0                         | 9.7                          |
| 2015 | 15023 | EM       | 06 Sept                            | 1                                        | -                           | -                    | -                      | -                     | -                           | -                                 | 14.0                         | 5.0                          |
| 2015 | 15024 | VV       | 23 Sept                            | 1                                        | -                           | -                    | -                      | -                     | -                           | -                                 | 16.7                         | 7.0                          |
| 2015 | 15025 | VV       | 10 Sept                            | 1                                        | -                           | -                    | -                      | -                     | -                           | -                                 | 7.3                          | 1.0                          |
| 2015 | 15026 | EM       | 09 Sept                            | 1                                        | -                           | -                    | -                      | -                     | -                           | -                                 | -                            | -                            |
|      |       |          |                                    | <b>Mean</b>                              | 177.1                       | 28.5                 | 33.4                   | 20.3                  | 93.5                        | 1.5                               | 10.3                         | 3.8                          |
|      |       |          |                                    | <b>± SE</b>                              | ± 22.3                      | ± 7.3                | ± 10.0                 | ± 6.0                 | ± 13.8                      | ± 0.9                             | ± 1.1                        | ± 1.1                        |

Table S2. Results for dimensional reduction of nest characteristics with PCA.

| Correlation Coefficient Matrix |       |        |       |       |             |         |       |
|--------------------------------|-------|--------|-------|-------|-------------|---------|-------|
|                                | Eggs  | Larvae | Pupae | Empty | Parasitised | Females | Males |
| Eggs                           |       | 0.91   | 0.72  | -0.34 | -0.07       | 0.78    | 0.55  |
| Larvae                         | 0.91  |        | 0.75  | -0.31 | -0.08       | 0.66    | 0.57  |
| Pupae                          | 0.72  | 0.75   |       | -0.01 | -0.07       | 0.7     | 0.93  |
| Empty                          | -0.34 | -0.31  | -0.01 |       | -0.27       | 0.05    | 0.05  |
| Parasitised                    | -0.07 | -0.08  | -0.07 | -0.27 |             | -0.1    | -0.1  |
| Females                        | 0.78  | 0.66   | 0.7   | 0.05  | -0.1        |         | 0.52  |
| Males                          | 0.55  | 0.57   | 0.93  | 0.05  | -0.1        | 0.52    |       |

mean  $r$  of variables in which  $r > 3 = 0.71 \pm 0.04$   
 mean  $r$  of number of empty cells to other variables =  $-0.14 \pm 0.08$   
 mean  $r$  of number of parasitised cells to other variables =  $-0.12 \pm 0.03$

| Bartlett's Test                 |  |
|---------------------------------|--|
| K-squared = 115.46, $p < 0.001$ |  |

| KMO statistic  |      |
|----------------|------|
| overall = 0.61 |      |
| per variable   |      |
| Eggs           | 0.65 |
| Larvae         | 0.60 |
| Pupae          | 0.60 |
| Females        | 0.62 |
| Males          | 0.56 |

| PCA                                                |       |
|----------------------------------------------------|-------|
| component with eigenvalue > 1 (76.94% of variance) |       |
| eigenvalue = 3.844                                 |       |
| communalities range = 0.656 to 0.871               |       |
| component loadings                                 |       |
| Eggs                                               | 0.907 |
| Larvae                                             | 0.892 |
| Pupae                                              | 0.933 |
| Females                                            | 0.837 |
| Males                                              | 0.811 |

Table S3. Minimum age of maturation in male Hymenoptera. 1 = complete sperm transfer into seminal vesicles; 2 = only in 10% of trials did males aged zero to one-day-old mate, compared to 80% of males older than two days.

| Level of Sociality  | Family        | Species                     | Definition of Maturity                               | Minimum Age                             | Reference                                    |
|---------------------|---------------|-----------------------------|------------------------------------------------------|-----------------------------------------|----------------------------------------------|
| Solitary Parasitoid | Braconidae    | <i>Fopius vandenboschi</i>  | Successful Mating                                    | zero-days-old                           | Ramadan et al., 1991                         |
|                     |               | <i>Fopius arisanus</i>      | Successful Mating & Complete Reproductive Maturation | two or four-days-old                    | Ramadan et al., 1992; Quimio & Walter, 2000  |
| Social              | Ichneumonidae | <i>Diadegma semiclausum</i> | Mating Occurrence                                    | < 12 hours                              | Khatri et al., 2008                          |
|                     | Vespidae      | <i>Polistes lanio</i>       | Complete Reproductive Maturation                     | 16 days-old (note - 1)                  | Gobbi, 1975 in Giannotti, 2004               |
|                     | Apidae        | <i>Bombus terrestris</i>    | Mating Occurrence                                    | six or 10 days-old                      | Duchateau & Mariën, 1995; Tasei et al., 1998 |
| Highly Social       | Apidae        | <i>Apis mellifera</i>       | Complete Reproductive Maturation                     | 12 or 16 days-old                       | Ruttner 1976; Rhodes, 2002                   |
|                     | Vespidae      | <i>Vespa velutina</i>       | Complete Reproductive Maturation                     | 10.3 days-old (mean)                    | Poidatz et al., 2017                         |
|                     | Formicidae    | <i>Linepithema humile</i>   | Mating Occurrence                                    | zero-days-old to one-day-old (note - 2) | Passera & Keller, 1992                       |

#### References

- Duchateau, M.J., & Mariën, J. (1995). Sexual biology of haploid and diploid males in the bumble bee *Bombus terrestris*. *Insectes Sociaux*, 42(3), 255–266.
- Gobbi, N. (1975). Aspectos evolutivos da bionomia das vespas, visualizadas através de estudos de reprodução (Hymenoptera, Aculeata). Master Dissertation, Faculdade de Medicina, Universidade de São Paulo, Ribeirão Preto.
- THE ABOVE IN - (IN) Giannotti, E. (2004). Male behavior in colonies of the social wasp *Polistes lanio* (Hymenoptera, Vespidae). *Sociobiology*, 43(3), 551–556.
- Khatri, D., Wang, Q., & He, X.Z. (2008). Development and reproduction of *Diadegma semiclausum* (Hymenoptera: Ichneumonidae) on diamondback moth, *Plutella xylostella* (Lepidoptera: Plutellidae). *New Zealand Plant Protection*, 61, 322–327.
- Passera, L., & Keller, L. (1992). The period of sexual maturation and the age at mating in *Iridomyrmex humilis*, an ant with intranidal mating. *Journal of Zoology*, 228(1), 141–153.
- Poidatz, J., Bressac, C., Bonnard, O., & Thiéry, D. (2017). Delayed sexual maturity in males of *Vespa velutina*. *Insect Science*, 1–11.
- Quimio, G.M., & Walter, G.H. (2000). Swarming, delayed sexual maturation of males, and mating behavior of *Fopius arisanus* (Sonan) (Hymenoptera: Braconidae). *Journal of Insect Behavior*, 13(6), 797–813.
- Ramadan, M.M., Wong, T.T., & Wong, M.A. (1991). Influence of parasitoid size and age on male mating success of Opiinae (Hymenoptera: Braconidae), larval parasitoids of fruit flies (Diptera: Tephritidae). *Biological Control*, 1(3), 248–255.
- Ramadan, M.M., Wong, T.T., & Beardsley, J.W. (1992). Reproductive behavior of *Biosteres arisanus* (Sonan) (Hymenoptera: Braconidae), an egg-larval parasitoid of the oriental fruit fly. *Biological Control*, 2(1), 28–34.
- Rhodes, J. (2002). Drone honey bees: rearing and maintenance. *Agnote*, DAV112, 1–2.
- Ruttner, H. (1976). Untersuchungen über die flugaktivität und das paarungsverhalten der drohnen. VI. – flug auf und über höhenrücken. *Apidologie*, 7(4), 331–341
- Tasei, J.N., Moirand, C., Moreau, L., Himpens, B., & Guyonnaud, S. (1998). Relationship between aging, mating and sperm production in captive *Bombus terrestris*. *Journal of Apicultural Research*, 37(2), 107–113.

## Dataset 1. Project Data

[Click here to Download Data S1](#)

## Figures

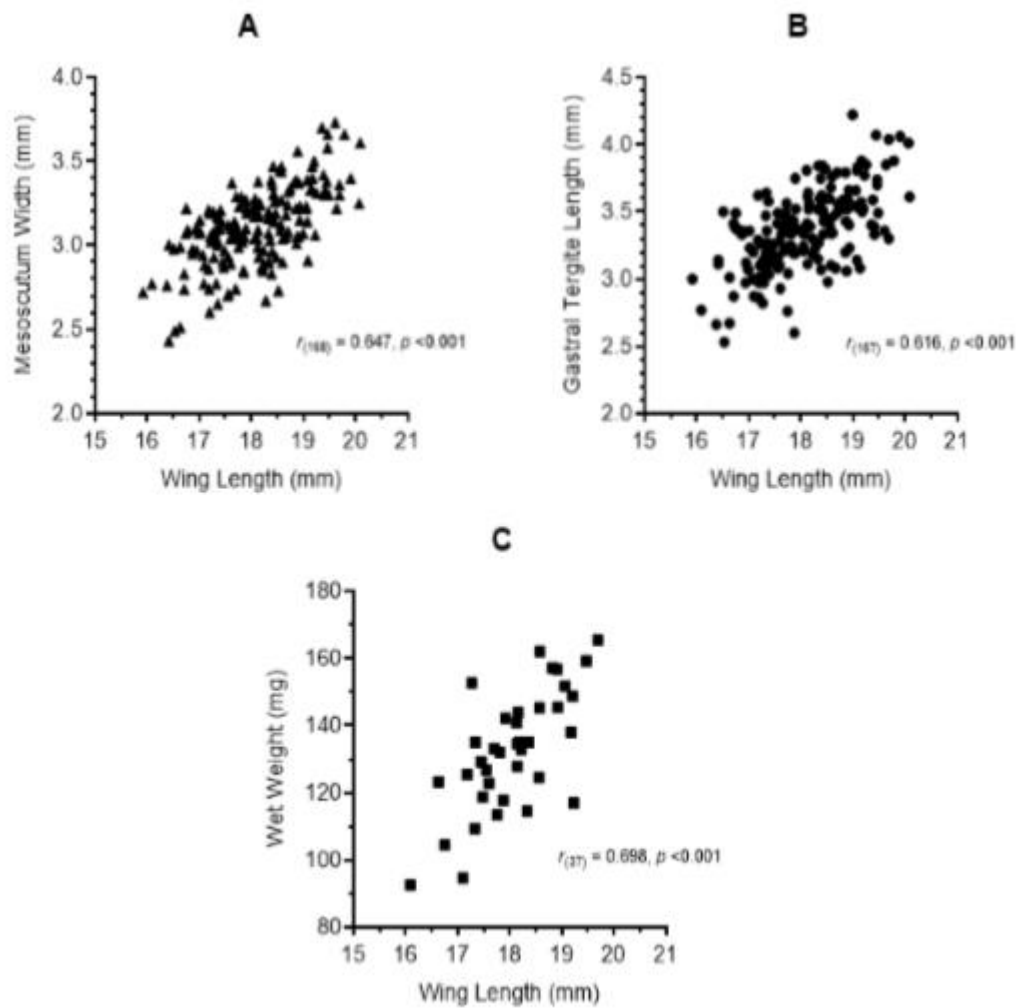

Figure S1. Wing length correlates with (A) mesoscutum width, (B) gastral tergite length and (C) wet weight of newly emerged zero-day-old males (Pearson's correlations,  $\alpha = 0.05, p < 0.001$ ).

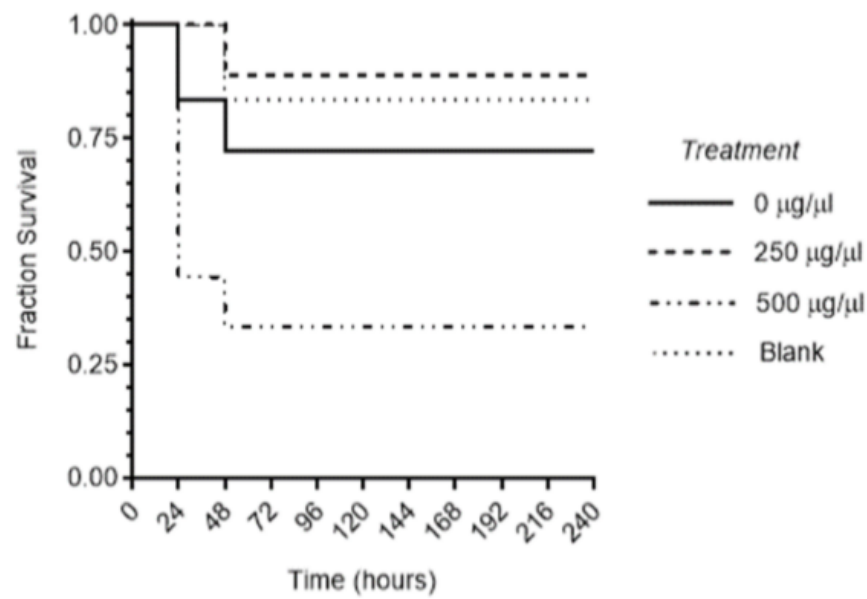

Figure S2. Significant (Cox2) higher mortality hazard rates in males treated with 500 µg/µl of methoprene compared to blank control males ( $p < 0.001$ ). Treatments 0 µg/µl and 250 µg/µl of methoprene not significantly different to blank control group. Survival analysis of males treated with 0, 250 or 500 µg/µl of methoprene in acetone, and a blank control, to select a suitable dosage for further testing.
